# Supplementary material for: Effect of SO2 poisoning on undoped and doped Mn-based catalysts for selective catalytic reduction of NO
Source: Royal Society of Chemistry journal article supplement (doi:10.1039/d2cy01151d), 2022-01-01
Supplement: d2cy01151d1.pdf [file d2cy01151d1.pdf]

## Supplementary Information

### Evaluation of the external and internal mass transfer limitations

The external mass transfer limitations were estimated by the Carberry criterion with the equation below:

$$Ca = \frac{r_{v,obs}}{a' k_f C_b} < 0.05$$

where  $r_{v,obs}$  is the observed reaction rate for NO conversion,  $a'$  is the  $a' = Ap/V_p$  is the specific area,  $k_f$  is the mass transfer coefficient (0.15 m/s, from <sup>1</sup>) and  $C_b$  is the NO concentration in the gas phase. The value of the Ca number at 150 °C for the maximum observed rate is 0.011, which satisfies the criteria and therefore the absence of external mass transport is confirmed.

The resistance of internal mass transfer inside of the catalyst particles was estimated by the Weisz-Prater criterion<sup>2</sup>, as shown in the equation (1)

$$\eta\phi^2 = \frac{r_{v,obs} \cdot L^2}{D_{eff} \cdot C_s} < 0.15 \quad (1)$$

where  $r_{v,obs}$  is the observed reaction rate for NO conversion,  $L$  is the characteristic length of the catalyst particles (we have considered particles of an average radius of 300  $\mu\text{m}$ ).  $D_{eff}$  is the NO effective diffusivity, which was taken from<sup>3</sup> ( $3 \cdot 10^{-6} \text{ m}^2/\text{s}$ ) and  $C_s$  is the NO surface concentration. The calculated value at 150 °C for the maximum observed rate is 0.056, therefore the reaction is not internal mass-transfer limited.

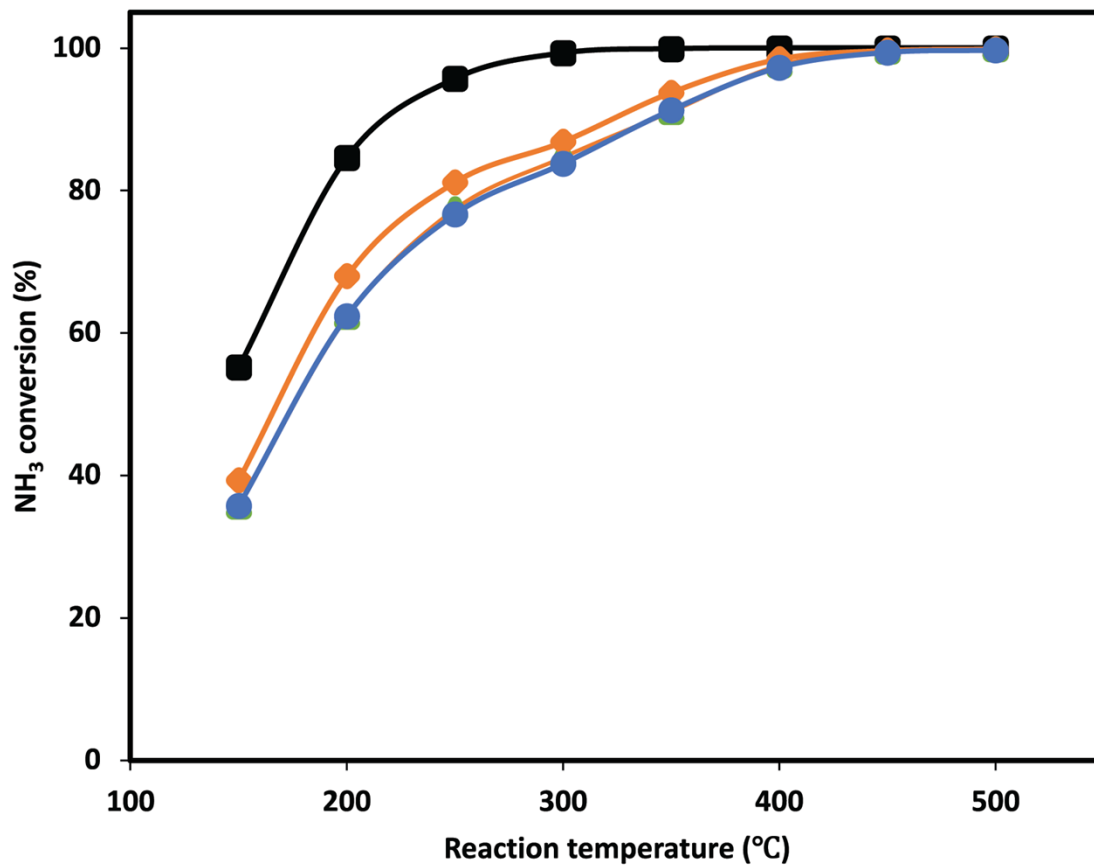

**Supplementary Fig 1.** NH<sub>3</sub> conversion as a function of the reaction temperature for Mn<sub>0.35</sub>Ce<sub>0.00</sub>Ti<sub>0.65</sub> (black), Mn<sub>0.37</sub>Ce<sub>0.04</sub>Ti<sub>0.59</sub> (orange), Mn<sub>0.33</sub>Ce<sub>0.07</sub>Ti<sub>0.60</sub> (green), Mn<sub>0.30</sub>Ce<sub>0.19</sub>Ti<sub>0.51</sub> (blue).

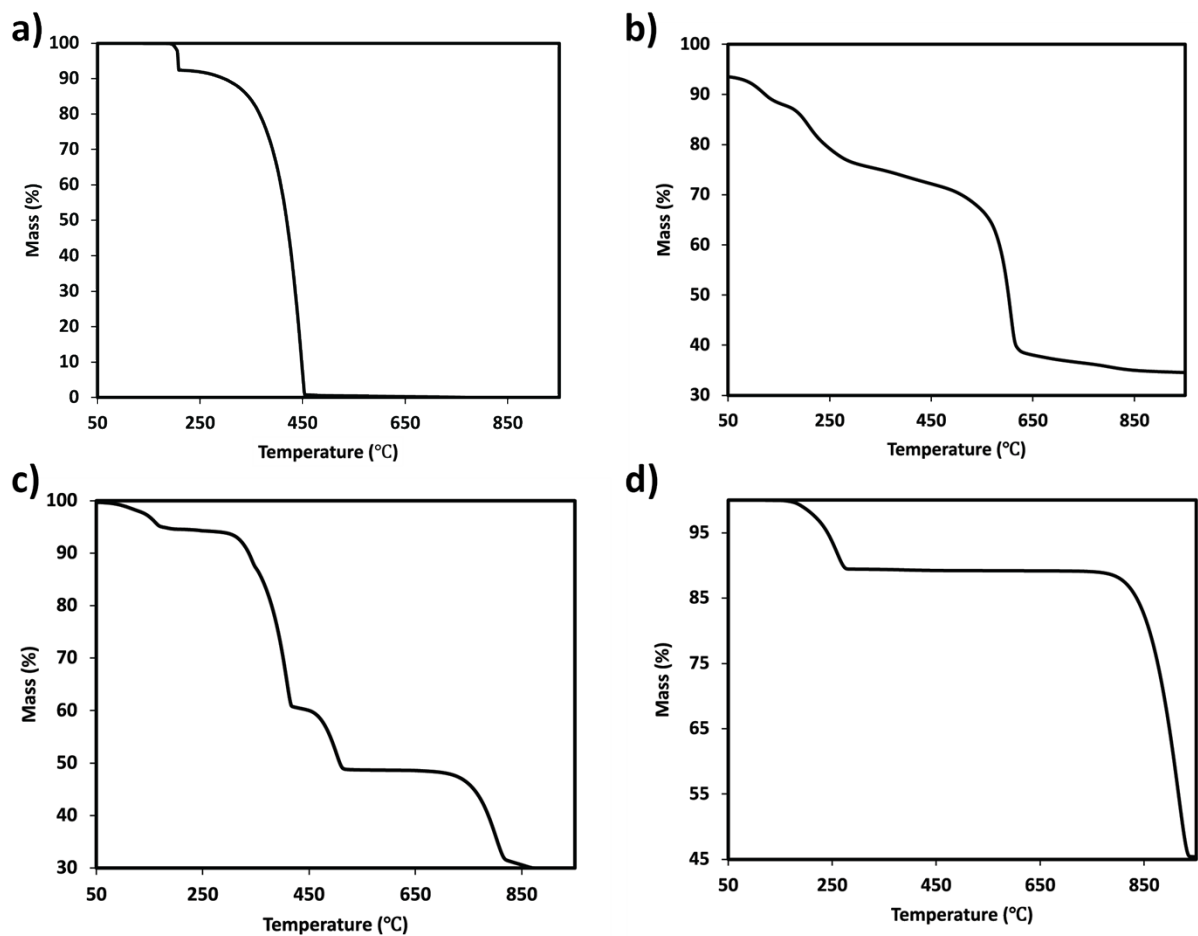

**Supplementary Fig 2.** TGA analysis of a) ammonium persulfate, b) Ti (IV) oxysulfate, c) Ce (IV) sulfate and d) Mn (II) sulfate.

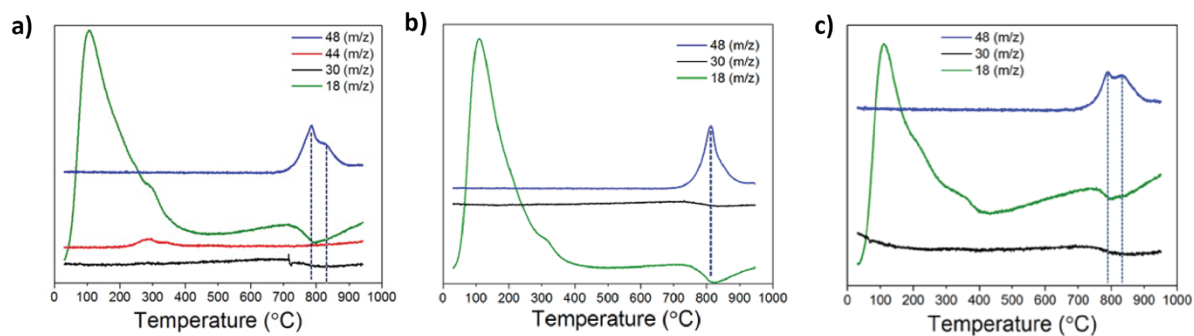

**Supplementary Fig 3.** Mass spectrometry analysis of the gases coming out of the TGA analysis of the a)  $Mn_{0.35}Ce_{0.00}Ti_{0.65}$ , b)  $Mn_{0.37}Ce_{0.04}Ti_{0.59}$  and c)  $Mn_{0.30}Ce_{0.19}Ti_{0.51}$  samples upon  $NH_3$ -SCR reaction with  $SO_2$ .

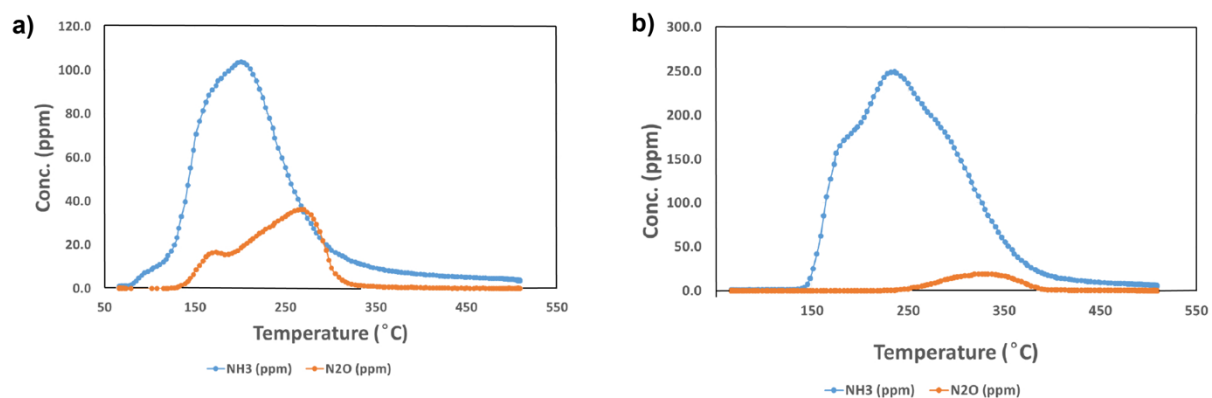

**Supplementary Fig 4.** Temperature-programmed desorption of  $\text{NH}_3$  for the a)  $\text{Mn}_{0.35}\text{Ce}_{0.00}\text{Ti}_{0.65}$  sample as fresh and b) upon  $\text{SO}_2$  deactivation. The orange line shows the evolution of  $\text{N}_2\text{O}$ , which is coming from the partial oxidation of  $\text{NH}_3$  on the catalyst surface.

**Supplementary Table 1.** Total amount of  $\text{NH}_3$  and  $\text{N}_2\text{O}$  release during  $\text{NH}_3$ -TPD experiments.

| Samples                                                                   | $\text{NH}_3$ ,<br>( $\mu\text{mol/g}$ ) | $\text{N}_2\text{O}$ ,<br>( $\mu\text{mol/g}$ ) | Total,<br>( $\mu\text{mol/g}$ ) |
|---------------------------------------------------------------------------|------------------------------------------|-------------------------------------------------|---------------------------------|
| $\text{Mn}_{0.35}\text{Ce}_{0.00}\text{Ti}_{0.65}$                        | 39.6                                     | 12.1                                            | 63.7                            |
| $\text{Mn}_{0.35}\text{Ce}_{0.00}\text{Ti}_{0.65}$ after<br>$\text{SO}_2$ | 98.2                                     | 4.9                                             | 108                             |

## XPS analysis and results

To model the Mn( $2p_{3/2}$ ) peaks of the catalysts, pure MnO, Mn<sub>2</sub>O<sub>3</sub>, MnO<sub>2</sub> and MnSO<sub>4</sub> samples were used as reference samples. Manganese(IV) oxide (99.997% - metals basis) was acquired from Alfa Aesar (Fisher US), manganese(III) oxide (99.9% - trace metals basis) was acquired from Sigma Aldrich. Manganese(II) oxide (99.99% - trace metal basis) and manganese(II) sulfate monohydrate (98+%) was acquired from Acros Organics (VWR). The fitting parameters data (FWHM and peak positions) obtained from the peak modelling of the standard samples were used for the calculation of the chemical state of manganese. Mn( $2p_{3/2}$ ) spectra of the reference samples are plotted in Supplementary Fig 4. The fitting parameter data (FWHM and peak position) used for the calculation of the chemical states of manganese in the catalysts can be found in our previous publication<sup>4</sup>

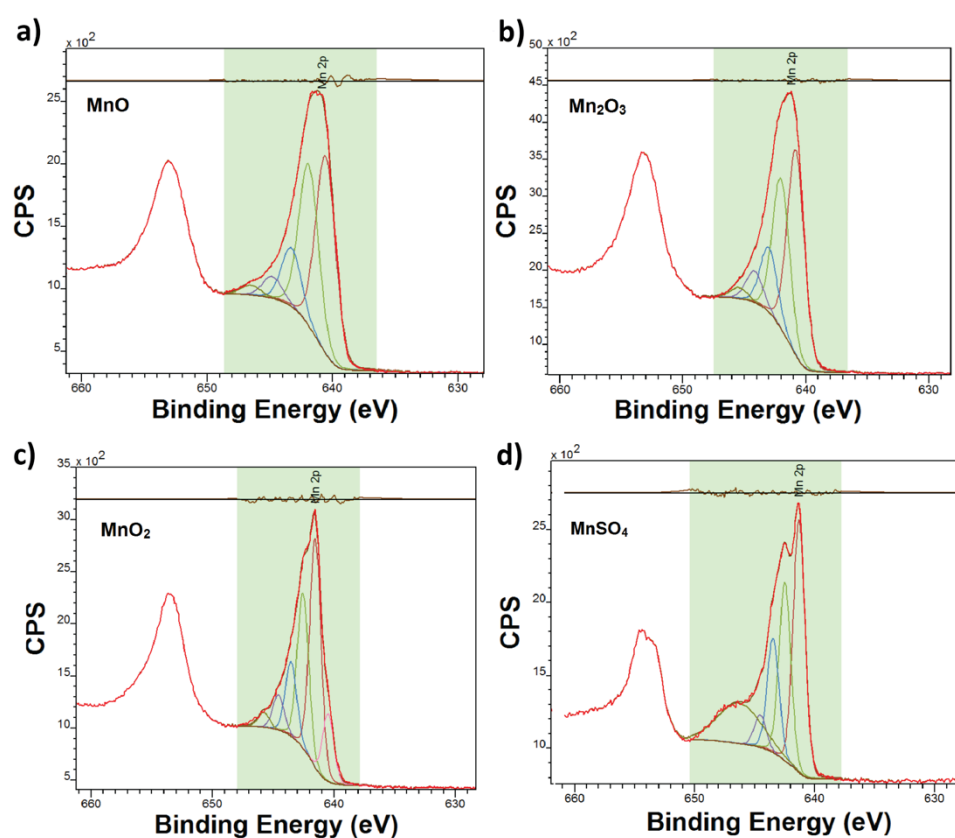

Supplementary Fig 5. Mn 2p spectra of a) MnO, b) Mn<sub>2</sub>O<sub>3</sub>, c) MnO<sub>2</sub> and d) MnSO<sub>4</sub>

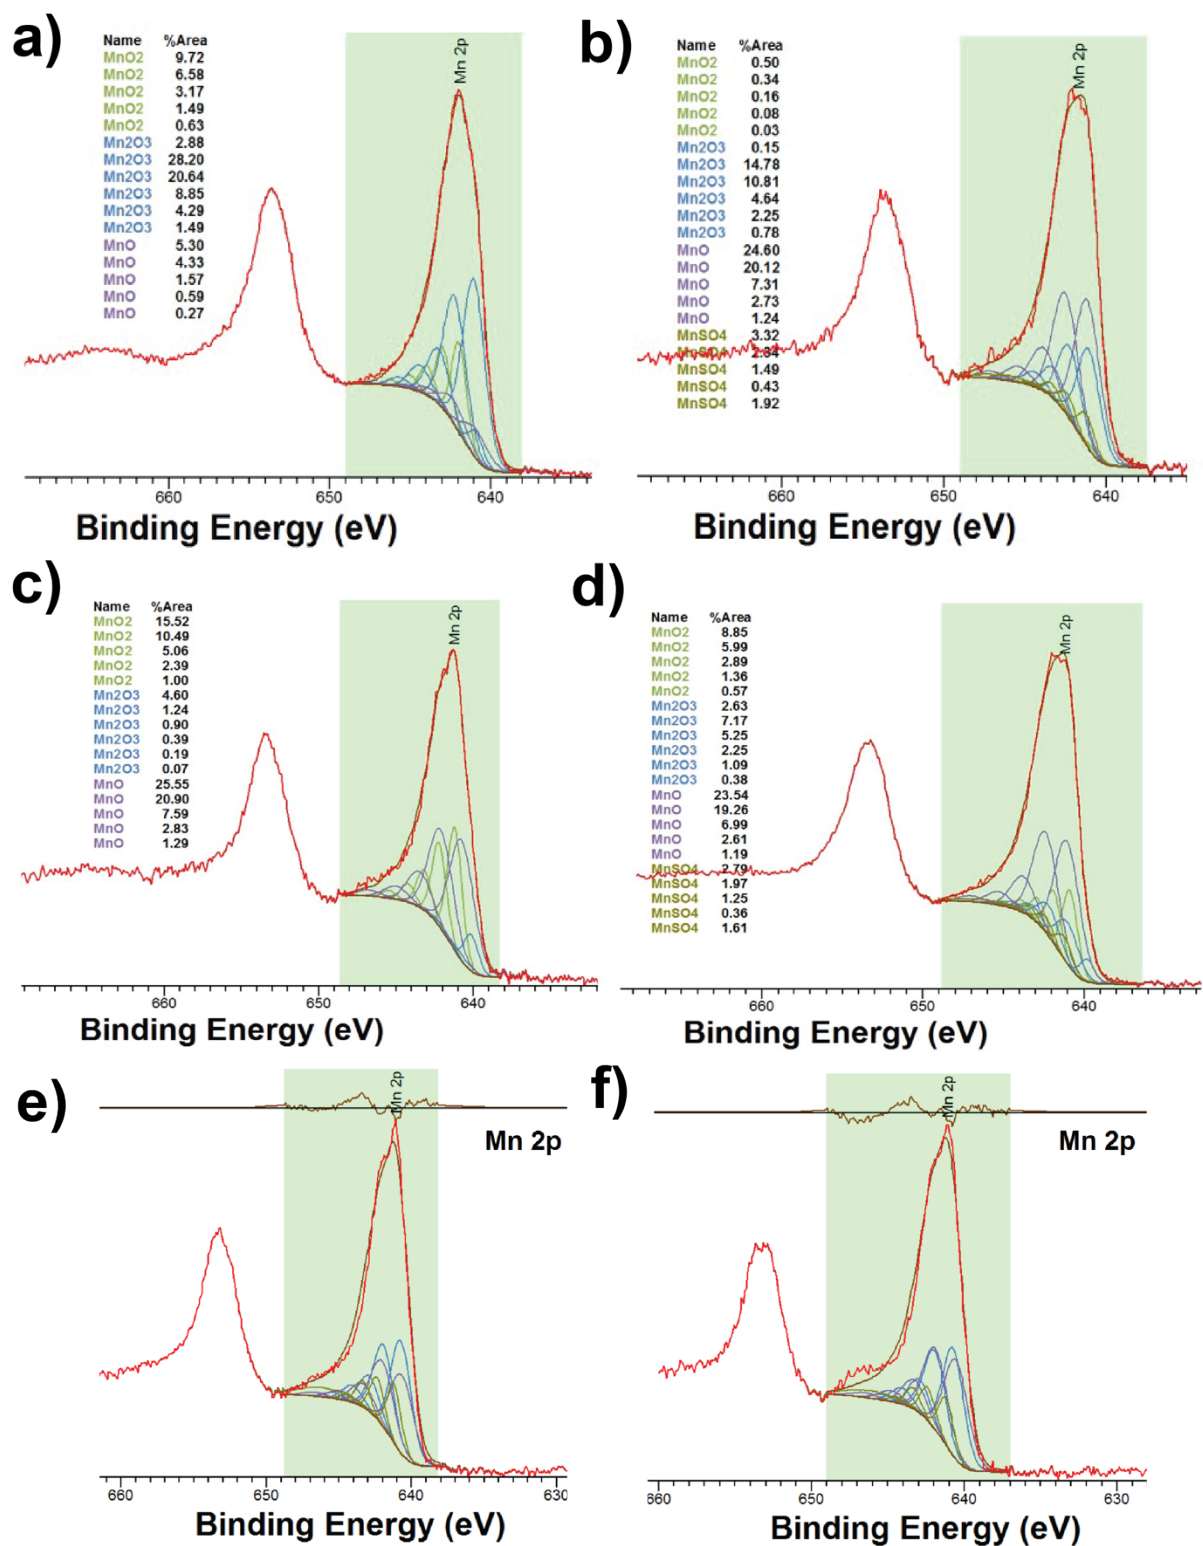

**Supplementary Fig 6.** Mn 2p spectra of Mn<sub>0.35</sub>Ce<sub>0.00</sub>Ti<sub>0.65</sub>, a) fresh and b) after SO<sub>2</sub> deactivation. Mn<sub>0.37</sub>Ce<sub>0.04</sub>Ti<sub>0.59</sub> c) fresh and d) after SO<sub>2</sub> deactivation. Mn<sub>0.30</sub>Ce<sub>0.19</sub>Ti<sub>0.51</sub> sample as e) fresh and f) after SO<sub>2</sub> deactivation.

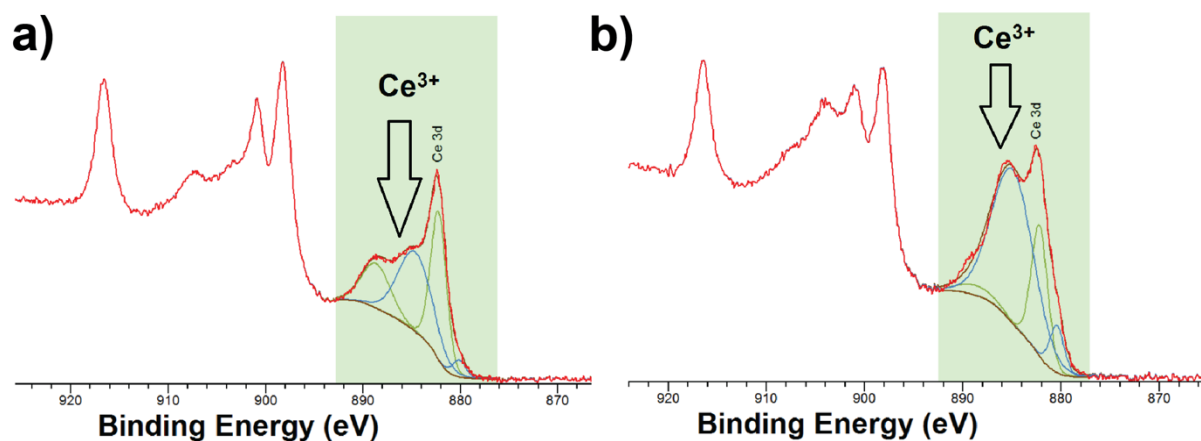

**Supplementary Fig 7.** Ce 3d spectra of  $\text{Mn}_{0.30}\text{Ce}_{0.19}\text{Ti}_{0.51}$  as a) fresh and b) upon  $\text{SO}_2$  deactivation.

## References

1. Karadağ, H. G.; Bozbağ, S. E.; Şanlı, D.; Demir, O.; Ozener, B.; Hisar, G.; Erkey, C., Chapter 4.3 - Mass Transfer Effects in SCR Reactor for  $\text{NO}_x$  Abatement in Diesel Engines. In *Exergetic, Energetic and Environmental Dimensions*, Dincer, I.; Colpan, C. O.; Kizilkan, O., Eds. Academic Press: 2018; pp 961-979.
2. Moulijn, J. A.; Tarfaoui, A.; Kapteijn, F., General aspects of catalyst testing. *Catal. Today* **1991**, *11* (1), 1-12.
3. Bozbağ, S. E., Kinetic model comparison and elucidation of mass transfer limitations in  $\text{NH}_3$ -SCR reactors using Vanadia based washcoats with different thicknesses. *Chem. Eng. Sci.* **2021**, *246*, 116892.
4. Gevers, L. E.; Enakonda, L. R.; Shahid, A.; Ould-Chikh, S.; Silva, C. I. Q.; Paalanen, P. P.; Aguilar-Tapia, A.; Hazemann, J.-L.; Hedhili, M. N.; Wen, F.; Ruiz-Martínez, J., Unraveling the structure and role of Mn and Ce for  $\text{NO}_x$  reduction in application-relevant catalysts. *Nat. Commun.* **2022**, *13* (1), 2960.
